# Supplementary material
Source: Elsevier journal article supplement (https://www.sciencedirect.com/science/article/pii/S2341287920300776)
Supplement: mmc1 [file S2341287920300776:mmc1.pdf]

## DIETA SIN FRUTOS SECOS

*FUENTES: Aegastro, Aedeseo*

**FUENTES: Aegastro, Aedeseo, AEPNAA Y [www.dietistasnutricionistas.es](http://www.dietistasnutricionistas.es)**

Durante la realización de la dieta, **evite comer fuera de casa** para tener un mejor control. En caso de comer fuera, intentar tomar alimentos frescos y evitar aquellos precocinados o con salsas preparadas

**Dieta estricta de eliminación de FRUTOS SECOS y de alimentos derivados de ellos** como los **aceites o las mantequillas**:

### EVITAR productos que contengan:

Arachis, cacahuetes o maní.

Almendras.

Nueces del Brasil.

Anacardos.

Avellanas.

Pipas de girasol.

Pistachos.

Castañas.

Nueces.

Nuez pacana.

Nuez dura americana.

Nuez macadamia

Semillas de lino

Piñon

Sésamo

### EVITAR etiquetas que contengan:

Mazapán o pasta de almendra

Denominaciones como emulsified o emulsionado o satay (salsa de cacahuete), lo cual podría indicar que el alimento fue espesado con cacahuetes o maníes.

Aceites de frutos secos

Mantequillas de frutos secos

## **ALIMENTOS PROHIBIDOS**

Como regla general, se deben evitar todos aquellos alimentos de los que no se tenga la certeza que **NO** contienen **frutos secos o derivados**

### **DEBE EVITAR:**

- Frutos secos: Arachis, cacahuets o maní, Almendras, Nueces, Anacardos. Avellanas.,  
Pipas de girasol, Pistachos, Castañas, Nueces, Semillas de lino, Piñon, Sésamo

-Turrónes, mazapanes y bombones.

-Frutos secos artificiales Nu-Nuts (son cacahuets a los que se les ha quitado el sabor y se les añade el sabor de un fruto seco como la pacana o la nuez)..

-Pasta y cremas de untar que contengan frutos secos como la pasta de almendra, NOCILLA, crema de cacahuete, NUTELLA

-Mantequilla de frutos secos (ej. mantequilla de anacardo, de almendra, de cacahuete o maníes).

-Aceite de frutos secos como el aceite de girasol.

- Pueden contenerlos gran variedad de productos de repostería y panadería: bizcochos, panes de semillas y similares

- Tenga cuidado al comer en restaurantes asiáticos donde se suele utilizar salsa "satay" o restaurantes tipo buffet, puesto que las cucharas de servicio se ponen y sacan de varias bandejas que pueden contener frutos secos o semillas que causen una contaminación cruzada entre los alimentos.

- Proteína vegetal hidrolizada (incluida en algunos cereales).

- Los alimentos étnicos, productos horneados preparados comercialmente, y los dulces pueden estar contaminados con frutos secos que se utilizan frecuentemente en este tipo de alimentos.

- Los frutos secos se añaden a una variedad cada vez mayor de salsas: salsa barbacoa, salsa pesto, salsa inglesas, también a los cereales, las galletas saladas y los helados

- Tahini: pasta de sésamo
