# Supplementary material
Source: Elsevier journal article supplement (https://www.sciencedirect.com/science/article/pii/S2341287920300776)
Supplement: mmc3 [file S2341287920300776:mmc3.pdf]

## DIETA SIN HUEVO

*FUENTES: Aegastro, Aedeseo AEPNAA y [www.stanfordchildrens.org](http://www.stanfordchildrens.org)*

### **Dieta estricta de eliminación de huevo, derivados y productos que lo contengan**

Existe reacción cruzada entre las proteínas de la clara y yema, y también entre huevos de diversos pájaros: gallina, pato, pavo, gaviota, codorniz

Durante la realización de la dieta, **evite comer fuera de casa** para tener un mejor control de la dieta.

Los huevos son un ingrediente utilizado comúnmente pero quizás no sean conscientes de la variedad de productos alimenticios que contienen huevos, por lo que es **importante leer las etiquetas de los alimentos.**

#### **EVITAR productos que contengan:**

**Albúmina**

**Coagulante**

**Emulsificante**

**Globulina**

**Lecitina o E 322**

**Livetina**

**Lisozima**

**Ovoalbúmina**

**Ovomucina**

**Ovovitulina**

**Vitelina**

**Ovomucoide**

**E 161 b (luteína, pigmento amarillo)**

#### **EVITAR etiquetas que contengan**

**Claras de huevo**

**Yema de huevo**

**Huevo deshidratado**

**Huevo en polvo**

**Sólidos de huevo**

**Sustitutos del huevo**

**Ponche**

**Mayonesa**

**Merengue**

**Simplese (sustitutos de grasa)**

**Surimi**

## **TABLA DE ALIMENTOS**

| <b>Alimentos</b>                              | <b>Permitidos</b>                                                                                                                                     | <b>No permitidos</b>                                                                                                                                                      |
|-----------------------------------------------|-------------------------------------------------------------------------------------------------------------------------------------------------------|---------------------------------------------------------------------------------------------------------------------------------------------------------------------------|
| <b>Panes y almidones</b>                      | Pan de harina común enriquecida o harina integral, pan de centeno o bollos (sin productos derivados del huevo ni pintados con huevo para dar brillo). | Hotcakes, waffles, donas y madalenas de elaboración comercial.                                                                                                            |
|                                               | Panecillos elaborados con polvo para hornear sin huevo.                                                                                               | Biscote, galletas saladas de bicarbonato, pan rallado y pretzels.                                                                                                         |
|                                               | Galletas y panes caseros elaborados con ingredientes permitidos.                                                                                      | Pasta o fideos al huevo.                                                                                                                                                  |
|                                               | La mayoría de los cereales y granos, tales como el arroz.                                                                                             | Mezclas para hornear, mezclas para rebozar o alimentos rebozados, tostadas francesas.                                                                                     |
| <b>Verduras</b>                               | Todas las verduras frescas, congeladas, deshidratadas y enlatadas.                                                                                    | Arroz frito con huevos.                                                                                                                                                   |
|                                               |                                                                                                                                                       | Panes de elaboración comercial o productos panificados elaborados con productos a base de huevo o pintados con huevo para dar brillo.                                     |
| <b>Frutas</b>                                 | Todas las frutas frescas, congelados, deshidratados o enlatados.                                                                                      | Todas las verduras preparadas en cacerola o con salsas o apanadas que contengan huevos en cualquier forma (como salsa holandesa, suflé de verduras o verduras rebozadas). |
|                                               |                                                                                                                                                       | Todas las frutas servidas con salsas que contengan huevo, tal como la salsa de natilla.                                                                                   |
| <b>Carne, sustitutos de la carne y huevos</b> | Cualquier corte de carne de vaca, ternera, cerdo, jamón, pollo, pavo, cordero, pescado o entrañas horneado, asado, hervido o rostizado.               | Batidos de frutas.                                                                                                                                                        |
|                                               | Carnes apanadas y fritas con                                                                                                                          | El huevo en todas sus formas y de cualquier animal, incluido el huevo en polvo o los sustitutos del huevo disponibles en el mercado.                                      |
|                                               |                                                                                                                                                       | Suflés                                                                                                                                                                    |

**Leche y  
productos  
derivados de la  
leche.**

pan sin huevo.

Carnes, pescado, pollo empanados de elaboración comercial.

Albóndigas, pastel de carne, croquetas, algunas salchichas.

Leche entera, baja en grasas o desnatada, suero de leche.

Malta con cacao, ponche, bebidas malteadas, natillas, Ovaltine, bebidas proteicas que contengan huevo, productos derivados del huevo o proteína de huevo.

Queso, requesón o yogur.

Postre, natilla o helado.

**Sopas y  
alimentos  
combinados**

Sopa o caldo preparado con ingredientes permitidos.

Cualquier preparación aclarada con huevo (consomé, caldo).

Sopa de tortuga o sopa de tortuga falsa, sopa de huevo o cualquier sopa con fideos o macarrones al huevo.

**Postres  
y dulces**

Gelatina, pastel de fruta, paleta helada, helado de fruta.

Pasteles, galletas, tartas rellenas con crema, merengues, batidos, natillas, pudín, helado, sorbetes.

Postres caseros elaborados con ingredientes permitidos.

Golosinas de chocolate elaboradas con crema o rellenos con dulce, golosinas de malvaviscos, dulce de leche, glaseados o coberturas glaseadas, salsa de chocolate. Postres en polvo.

Caramelos.

Tapa de masa o gominolas pintadas con claras de huevo.

Postres elaborados con Simplesse.

**Grasas y aceites**

Manteca, margarina, aceite vegetal, grasa para cocinar, salsa de crema, aderezo de aceite y vinagre, mayonesa sin huevo, tocino.

Aderezos para ensalada y mayonesa (a menos que sean sin huevo).

Salsa tártara.

Productos sin grasas elaborados con Simplese.

**Bebidas**

Agua, jugo de frutas, bebidas de frutas.

Cerveza de raíz, vino o café si están aclarados con huevo.

Té.

Bebidas con gas.

Azúcar, miel, mermelada, jalea.

Sal, especias.

**Condimentos y otros**

Salsas de crema elaboradas con huevos.

Salsa holandesa, salsa tártara, salsa de malvadisco.

Polvo para hornear con clara de huevo o albúmina de huevo.

Cualquier producto elaborado con Simplese u otro sustituto de grasa a base de huevo.

Complementos vitamínicos o fármacos que contengan lisozima
