# Supplementary material
Source: Elsevier journal article supplement (https://www.sciencedirect.com/science/article/pii/S2341287920300776)
Supplement: mmc6 [file S2341287920300776:mmc6.pdf]

## DIETA SIN PESCADO Y MARISCO

*FUENTES: Aegastro, Aedeseo y AEPNAA*

Durante la realización de la dieta, **evite comer fuera de casa** para tener un mejor control. En caso de comer fuera, intentar tomar alimentos frescos y evitar aquellos precocinados o con salsas preparadas

No podrá tomar ningún alimento que contenga productos derivados del mar, ríos o piscifactorías. Deben evitarse **pescados y mariscos** frescos como aquellos en conserva.

Prestar atención a la presencia de estos productos en ensaladas y otros platos preparados.

### Evitar:

- Pescado fresco (gallo, rape, bacalao...)
- Pescado congelado (salmón merluza..)
- Conservas (atún, sardina..)
- Pescado ahumado (salmón..)
- Marisco fresco, congelado o conserva:
- Crustáceos (gamba, langostino..)
- Cefalópodos (sepia, pulpo, calamar)
- Moluscos (mejillón, almejas..)

### Pueden contener:

- Caldos y sopas
- Platos preparados
- Platos precocinados
- Harinas de pescado
- Gelatinas
- Bebidas alcohólicas y vinos con cola de pescado
- Vitaminas con aceite pescado
- Fármacos con hígado bacalao
