# Supplementary material
Source: Elsevier journal article supplement (https://www.sciencedirect.com/science/article/pii/S2341287920300776)
Supplement: mmc7 [file S2341287920300776:mmc7.pdf]

## Recomendaciones generales dieta esofagitis eosinofílica

Reducir el consumo de alimentos procesados, dando prioridad a las preparaciones culinarias realizadas en casa, de este modo es más fácil el control de alérgenos y se utilizan alimentos con una mayor densidad nutricional.

Utilizar como bebida de referencia el agua, evitando bebidas carbonatadas.

Utilizar como grasa de referencia el aceite de oliva virgen , para crudo y para cocinar.

Control del etiquetado de alimentos y productos para alimentación

En caso de duda sobre la presencia de un alimento no apto, evitar el consumo

Lavar las manos antes de cocinar y/o comer

Evitar utensilios contaminados

No compartir cubiertos

Utilizar superficies de cocinado limpias

Utilizar electrodomésticos de cocina limpios

Colocar los alimentos no aptos por debajo de los alimentos aptos en la despensa y la nevera

Utilizar tablas y cubiertos de plástico o metal

Evitar alimentos que se han elaborado en aceites en los que previamente se han cocinado alimentos no aptos

Extremar las precauciones en las comidas que se realizan fuera de casa

| ALÉRGENO                   | POSIBLE CARENCIA                                                                                                       | ALTERNATIVAS<br>(si no alergia o exclusión)                                                                                                                                                                                                                                                                                                                                                                                                      |
|----------------------------|------------------------------------------------------------------------------------------------------------------------|--------------------------------------------------------------------------------------------------------------------------------------------------------------------------------------------------------------------------------------------------------------------------------------------------------------------------------------------------------------------------------------------------------------------------------------------------|
| <b>LECHE ANIMAL</b>        | Proteínas<br>Calcio<br>Riboflavina (Vit B <sub>2</sub> )<br>Fósforo<br>Vitaminas A, y D<br>Vitamina (B <sub>12</sub> ) | <b>Macronutrientes:</b><br>Incrementar otras fuentes de proteína como carne, <b>pescado, legumbres, huevos.</b><br><b>Micronutrientes:</b><br>Bebidas vegetales aptas fortificadas con Calcio.<br>Verduras de hoja verde<br><b>Sardinias</b><br><b>Almendras</b><br>Actividad al aire libre                                                                                                                                                      |
| <b>CEREALES CON GLUTEN</b> | Proteínas<br>Hidratos de carbono complejos<br>Vitaminas grupo B<br>Hierro<br>Fibra                                     | <b>Macronutrientes:</b><br>Incrementar otras fuentes de proteína como carne, <b>pescado, legumbres, huevos, leche animal.</b><br>Incrementar otras fuentes de Hidratos de Carbono como tubérculos (patata, boniato, chufa,...), pseudocereales, cereales sin gluten...<br><b>Micronutrientes:</b><br>Incrementar frutas, verduras, vegetales de hoja verde, cereales integrales sin gluten, pseudocereales (quinoa, trigo sarraceno y amaranto). |

| ALÉRGENO            | POSIBLE CARENCIA                                                                                                                                                                                        | ALTERNATIVAS<br>(si no alergia o exclusión)                                                                                                                                                                                                                                                                                                          |
|---------------------|---------------------------------------------------------------------------------------------------------------------------------------------------------------------------------------------------------|------------------------------------------------------------------------------------------------------------------------------------------------------------------------------------------------------------------------------------------------------------------------------------------------------------------------------------------------------|
| HUEVO               | Proteínas<br>Hierro<br>Biotina (Vit B7)<br>Folato (Vit B9)<br>Riboflavina (Vit B2)<br>Cobalamina (Vit B12)<br>Vitaminas A , D y E                                                                       | <b>Macronutrientes:</b><br>Incrementar otras fuentes de proteína como carne, <b>pescado, legumbres, leche y derivados.</b><br><b>Micronutrientes:</b><br>Incrementar frutas, vegetales, verduras de hoja verde, <b>cereales enteros.</b><br>Incrementar actividad al aire libre.                                                                     |
| LEGUMBRES           | Proteínas, Hidratos de Carbono<br>Tiamina (Vit B1)<br>Riboflavina (Vit B2)<br>Piridoxina (Vit B6)<br>Hierro, Calcio, Zinc<br>Fibra                                                                      | <b>Macronutrientes:</b><br>Incrementar otras fuentes de proteína como carne, <b>pescado, huevo, leche y derivados.</b><br>Incrementar otras fuentes de hidratos de carbono como <b>cereales integrales</b> , tubérculos, pseudocereales.<br><b>Micronutrientes:</b> incrementar fruta, verdura, vegetales de hoja verde, <b>cereales integrales.</b> |
| FRUTOS SECOS        | Proteínas, Hidratos de carbono y Grasas saludables<br>Vitamina E<br>Folato (Vit B9)<br>Tiamina (Vit B1)<br>Niacina (Vit B3)<br>Riboflavina (Vit B2)<br>Calcio, hierro, magnesio, fósforo, potasio, zinc | <b>Macronutrientes:</b><br>Incrementar otras fuentes de proteína como carne, <b>pescado, legumbres, huevos, leche y derivados.</b><br><b>Micronutrientes:</b><br>Incrementar frutas ,vegetales, <b>cereales enteros</b> , aguacate, <b>pescado azul.</b><br>Utilizar aceite de oliva virgen en crudo y para cocinar.                                 |
| PESCADOS Y MARISCOS | Proteínas<br>Niacina (Vit B3)<br>Piridoxina (Vit B6)<br>Cobalamina (Vit B12)<br>Vitamina D<br>Vitamina A y E                                                                                            | <b>Macronutrientes:</b><br>Incrementar otras fuentes de proteína como carne, <b>legumbres, huevos, leche y derivados.</b><br><b>Micronutrientes:</b><br>Frutas<br>Vegetales<br><b>Cereales integrales</b><br>Incrementar actividad al aire libre.                                                                                                    |
